# Supplementary material for: Flavonoid Versus Artemisinin Anti-malarial Activity in Artemisia annua Whole-Leaf Extracts
Source: Front Plant Sci. 2019 Jul 30;10:984. doi: 10.3389/fpls.2019.00984 (PMC6683762; doi:10.3389/fpls.2019.00984)
Supplement: Supplementary file 4 [file Table_4.XLSX]

## Sheet: all 
Peak_ID	isotopes	adduct	Formula	Annotation	Statistical model	p-value	AA L1_5	AA L7_9	AA L11_13	AA Dry	GA L1_5	GA L7_9	GA L11_13	GA Dry	GG L1_5	GG L7_9	GG L11_13	GG Dry	AA L1_5	AA L7_9	AA L11_13	AA Dry	GA L1_5	GA L7_9	GA L11_13	GA Dry	GG L1_5	GG L7_9	GG L11_13	GG Dry	AA L1_5	AA L7_9	AA L11_13	AA Dry	GA L1_5	GA L7_9	GA L11_13	GA Dry	GG L1_5	GG L7_9	GG L11_13	GG Dry
M183.0651T36	[2][M]+		C9H11O4	2,4-dihydroxy-6-methoxy acetophenone_1.1.1.1	REML	0	12.0429	1.77733	1.6257	0.366361	12.5449	2.1386	1.67111	0.401935	11.8445	1.69861	1.75287	0.383976	b	a	a	a	b	a	a	a	b	a	a	a	3.24242	0.697546	0.77848	0.0888661	4.92158	0.398534	0.76273	0.135041	2.74963	0.699766	0.824953	0.0952664
M219.1742T105	[6][M]+		C15H23O	4,7(11)-Amorphadien-12-al_1.6.1.2	REML	0	0.0825394	0.205692	0.135929	0.0105766	0.0537915	0.215344	0.136717	0.00752413	0.067422	0.174059	0.144089	0.00413912	e	a	b	cd	cde	a	b	cd	ce	ab	b	d	0.0517798	0.0512094	0.0427261	0.00911717	0.0113594	0.0614849	0.0305081	0.00598222	0.0200107	0.0355506	0.039872	0.00387195
M219.1743T78			C15H23O	4,7(11)-Amorphadien-12-al_3.6.1.2	REML	8.88178e-16	0.0225632	0.0275284	0.0155229	0.00724141	0.0772323	0.10512	0.0498283	0.00137417	0.0771749	0.116566	0.0752915	0.00227468	ab	ab	ab	ab	cd	ce	ad	ab	cd	e	cd	b	0.00685995	0.0115606	0.0054378	0.00276438	0.0199868	0.0376462	0.0207072	0.000927751	0.0375782	0.0491813	0.0392724	0.00332412
M219.1743T66			C15H23O	4,7(11)-Amorphadien-12-al_4.6.1.2	REML	0	0.059683	0.0373311	0.0253079	0.00083731	0.127534	0.133343	0.0639696	0.0139705	0.0843015	0.104849	0.0718434	0.00450534	ace	abc	ab	b	d	d	ace	ab	ef	df	cef	b	0.0295687	0.0130651	0.0183202	0.00137129	0.0355908	0.0362681	0.0314638	0.0100084	0.0351196	0.0349153	0.0326484	0.0040951
M205.1950T87			C15H25	a-guaiene_1.2.1.5	REML	0	0.146004	0.0096052	0.00501828	0.01054	0.366421	0.0775098	0.0391193	0.0417491	0.286061	0.0759048	0.0394379	0.0320367	e	a	a	ab	c	b	ab	ab	d	b	ab	ab	0.0370184	0.00871347	0.0036739	0.00589976	0.0826888	0.0441495	0.0138972	0.015866	0.067277	0.0722103	0.0260231	0.00506296
M205.1950T102	[5][M]+	[M+Na]+ 182.213	C15H25	amorpha-4,11-diene	REML	2.57264e-09	0.133213	0.122855	0.191875	0.0974899	0.160365	0.122493	0.194134	0.0780544	0.130309	0.0970811	0.154395	0.051831	abcf	abc	d	abce	adf	abce	df	bce	abc	be	acdf	e	0.0374446	0.0488982	0.0667945	0.0276694	0.0274149	0.0471275	0.0738483	0.0233273	0.0325524	0.0337024	0.0548656	0.0243557
M203.1793T82		[M+Na]+ 180.201	C15H23	amorpha-4,11-diene tertiary allylic hydroperoxide C15H23	REML	0	1.35375	1.13701	0.309218	0.0197265	0	0.0286395	0.00354963	0.00287693	0	0.000641549	0.000492503	0.00659052	a	a	b	c	c	c	c	c	c	c	c	c	0.331671	0.415868	0.157415	0.0257556	0	0.0355616	0.00471496	0.00643301	0	0.0015103	0.000942431	0.00712671
M237.1848T64	[14][M]+		C15H25O2	amorpha-4,11-diene tertiary allylic hydroperoxide_1.1.1.1	REML	7.82041e-13	0.0827141	0.123205	0.14202	0.0918252	0.451436	0.485545	0.392342	0.397774	0.405419	0.45889	0.528691	0.288192	b	ab	ab	ab	cd	cd	cd	cd	cd	cd	c	ad	0.0486438	0.0395728	0.0623236	0.0308456	0.179857	0.137602	0.105685	0.0746915	0.150048	0.128582	0.238373	0.0870435
M233.1535T51			C15H21O2	Annulide_2.2.1.5	REML	5.9952e-15	0.0104524	0.00563477	0.0045075	0.00150701	0.072307	0.16561	0.165357	0.105123	0.0676261	0.169835	0.161008	0.0833017	ab	ab	a	ab	abc	d	d	cd	abc	d	d	bc	0.00547761	0.00424043	0.00456386	0.00171778	0.0216863	0.0819313	0.0579523	0.0227004	0.0270709	0.111418	0.0522392	0.0145829
M249.1484T50			C15H21O3	arteannuin B	REML	0	0.00125535	0.00518755	0.00667527	0.00164192	0.0773308	0.115455	0.127706	0.107135	0.0777577	0.144044	0.194585	0.116793	a	a	a	a	b	bcd	cd	bcd	bc	d	e	bcd	0.00175688	0.00461353	0.00464836	0.00163945	0.0331281	0.0447632	0.0458594	0.0467588	0.0278675	0.0594055	0.0795604	0.0310352
M251.1641T82		[M+H]+ 250.157	C15H23O3	Arteannuin EF_4.5.1.6	REML	0	0	0.00128789	0.000951346	0	0.129906	0.248033	0.375643	0.0233737	0.1029	0.228538	0.386163	0.0375348	a	a	a	ab	c	d	e	abc	bc	d	e	abc	0	0.00191492	0.0012693	0	0.0250095	0.0664456	0.123242	0.0255314	0.0309753	0.0730115	0.152817	0.0192558
M251.1639T76			C15H23O3	Arteannuin EF_5.5.1.6	REML	0	0.000795637	0.00368562	0.00480218	0.00030956	0.0766056	0.216797	0.206137	0.0969446	0.0667678	0.176503	0.215355	0.0525525	a	a	a	a	b	c	c	b	b	c	c	ab	0.00100504	0.00288361	0.0047095	0.000812518	0.0177566	0.0471133	0.0517994	0.0187401	0.020969	0.0380909	0.0822102	0.0243177
M283.1538T49			C15H23O5	Arteannuin G_1.1.1.2	REML	0	0.0110434	0.0659456	0.095591	0.0179333	0.14103	0.372723	0.118	0.00190367	0.110686	0.345784	0.161161	0.00194616	c	abc	abd	ac	bd	e	bd	ac	bd	e	d	c	0.00626408	0.023296	0.0301971	0.00687914	0.0492129	0.115287	0.0766836	0.00200453	0.0387501	0.0970461	0.0661349	0.00217313
M269.1748T53		[M+K+HCOOH]+ 184.206 [M+Na+HCOOH]+ 200.18 [M+H+HCOOH]+ 222.162	C15H25O4	Arteannuin MO_2.3.1.3	REML	0	0	0.00103516	0.00297711	0.000936059	0.2365	0.462717	0.565768	0.446827	0.223392	0.453609	0.63911	0.372104	a	a	a	a	b	cd	ce	cd	b	cd	e	bd	0	0.00144827	0.00288779	0.00232729	0.0561051	0.111285	0.132845	0.149992	0.0643536	0.109706	0.207774	0.17503
M269.1747T48		[M+K]+ 230.211 [M+Na]+ 246.185 [M+H]+ 268.167	C15H25O4	Arteannuin MO_3.3.1.3	REML	2.44249e-15	0	0.000718932	0.000711739	0.000354638	0.278816	0.271038	0.107968	0.0422534	0.2032	0.236388	0.105163	0.0194908	a	a	a	a	b	b	ac	a	bc	b	ac	a	0	0.00114315	0.00121502	0.000695125	0.0579743	0.166628	0.0407449	0.023527	0.073161	0.154802	0.0912408	0.0102346
M221.1535T43	[10][M]+	[M+H-H20]+ 238.158	C14H21O2	arteannuin x C14H21O2	REML	0	0.892924	2.58356	3.67018	2.28417	0.125657	0.277673	0.295497	0.160734	0.0326265	0.0791045	0.108557	0.0444917	d	a	b	a	c	cd	cd	cd	c	c	c	c	0.267643	0.910744	1.24198	0.700235	0.0325806	0.0791251	0.0934109	0.0103265	0.00860111	0.0237712	0.0500961	0.0112374
M389.1228T61			C20H21O8	artemetin_1.1.1.1	REML	0	0.594614	0.226062	0.174113	0.124137	0.330648	0.0963247	0.0417682	0.0451159	0.264444	0.0693008	0.0382331	0.0315378	e	abc	abd	abd	c	bd	d	bd	ac	d	d	d	0.234402	0.142092	0.0904945	0.0339428	0.14144	0.051642	0.0518443	0.0254869	0.0919123	0.0699416	0.0418016	0.0340173
M235.1692T84			C15H23O2	artemisinic acid	REML	0	0.122634	0.101488	0.0806466	0.03406	1.3657	0.558194	0.246822	0.247629	1.13519	0.587948	0.361166	0.159328	ab	ab	a	a	c	d	ab	abd	c	d	bd	ab	0.0354899	0.0748094	0.0565486	0.0226558	0.351058	0.295647	0.104458	0.0353044	0.308295	0.354955	0.172018	0.0825689
M221.1898T86			C15H25O	artemisinic alcohol	REML	0	0.192618	0.0149452	0.0101693	0.0140533	0.642568	0.101862	0.0282748	0.0108638	0.47607	0.119127	0.034393	0.00395271	d	a	a	ab	c	abd	ab	ab	e	bd	ab	a	0.0543738	0.0106268	0.00704016	0.00764428	0.182037	0.0589112	0.00903334	0.0120085	0.0719399	0.1315	0.0180444	0.0021186
M219.1743T87	[7][M]+	[M+K+NH3]+ 163.197 [M+Na+NH3]+ 179.171 [M+H+NH3]+ 201.155 [M+H]+ 218.172	C15H23O	artemisinic aldehyde	REML	0	0	0	0.000120912	0.000197565	0.220557	0.0876003	0.0511453	0.033348	0.341725	0.137237	0.100572	0.0314753	a	a	a	a	b	cde	acd	acd	f	e	de	ac	0	0	0.000418851	0.000271418	0.0532182	0.0390427	0.00952511	0.0120495	0.079751	0.0841926	0.0430723	0.0106261
M283.1540T61	[21][M]+	[M+K]+ 244.182	C15H23O5	artemisinin	REML	0	0.0111679	0.00729806	0.0349075	0.0136698	2.41078	8.07988	10.4205	9.93719	2.00898	6.49294	11.0818	8.6335	a	a	a	ab	b	cd	ef	cef	ab	d	e	cdf	0.00838444	0.00763558	0.0590617	0.00873884	0.483219	1.0552	3.37658	1.21061	0.475208	1.80778	3.04432	1.074
M153.1271T56			C10H17O	camphor	REML	7.25701e-10	0.100571	0.046267	0.0444164	0.0265825	0.128945	0.075563	0.0763441	0.0549857	0.162064	0.0953168	0.092402	0.0340829	bcd	a	a	ab	cd	ab	ab	abc	d	abc	abc	ab	0.0683138	0.0305798	0.0357789	0.00796342	0.101213	0.061529	0.0737688	0.0527093	0.0884325	0.0520721	0.0498911	0.036373
M375.1072T54	[24][M]+		C19H19O8	casticin	REML	0	3.60691	1.40332	1.10797	0.635075	3.57708	1.68011	1.2515	0.937539	2.86785	1.40419	1.31159	0.791232	c	ab	ab	a	c	b	ab	ab	c	ab	ab	ab	0.764969	0.735678	0.640556	0.247036	0.972328	0.745478	0.435731	0.178076	0.641092	0.724719	0.563188	0.137573
M361.0918T46		[3M+2Na+2K-H]3+ 320.117	C18H17O8	chrysoplenol C_1.1.1.4	REML	6.63901e-08	0.393528	0.150142	0.128762	0.0498613	0.851048	0.512592	0.375418	0.288266	0.628744	0.46258	0.458362	0.194041	abce	abc	ab	b	d	ce	abce	abce	de	ace	abce	abc	0.171081	0.100222	0.133387	0.0371996	0.408497	0.202228	0.233875	0.118591	0.394915	0.45205	0.306584	0.0854713
M267.1590T63		[M+Na]+ 244.182	C15H23O4	deoxyartemisinin	REML	0	0.00207942	0.000622955	0.00268609	0.0035857	0.154994	0.315537	0.403113	0.594629	0.121449	0.264101	0.446854	0.792662	a	a	a	ab	cd	ef	eg	h	bc	df	gh	i	0.00368908	0.00127185	0.00349617	0.00387477	0.0259545	0.072128	0.118819	0.0443031	0.0360068	0.0641412	0.194829	0.167373
M237.1847T84	[15][M]+		C15H25O2	dihydroartemisinic acid	REML	0	0.801742	0.620044	0.335586	0.109304	9.4283	3.0174	1.43668	1.00598	8.45128	2.93581	1.78532	0.987362	a	a	a	a	b	c	ac	ac	b	c	ac	ac	0.344722	0.312837	0.200907	0.0381553	2.84092	1.45733	0.549368	0.42837	2.33541	2.83921	1.02561	0.35871
M235.1692T64		[M+K]+ 196.196	C15H23O2	dihydroartemisinic acid tertiary allylic hydroperoxide 11 epimer C15H23O2	REML	2.19555e-08	0.0299958	0.0539556	0.0195654	0.00124237	0.0820895	0.480289	0.291738	0	0.0908539	0.505613	0.591468	0	a	a	a	a	a	b	ab	a	a	b	b	a	0.0174881	0.0228296	0.0122702	0.00188704	0.0904644	0.227258	0.382095	0	0.0681703	0.280823	0.624302	0
M235.1693T59	[11][M]+		C15H23O2	dihydroartemisinic acid tertiary allylic hydroperoxide C15H23O2	REML	0	0.0169872	0.0106201	0.0162349	0.0279176	3.88157	5.08205	1.21361	0.0960712	3.46674	4.7348	1.60757	0.0609657	a	a	a	a	bc	d	ae	a	b	cd	e	a	0.00846853	0.00774366	0.00727705	0.00997674	0.90093	1.66282	0.603392	0.014335	0.751116	1.84098	0.543189	0.0202997
M235.1693T63			C15H23O2	dihydroartemisinic acid tertiary allylic hydroperoxide2 C15H23O2	REML	2.22045e-16	0.00139454	0.000143457	0.000740101	0.000662228	0.201921	0.254786	0.462029	0.279283	0.200286	0.270795	0.416295	0.21233	a	a	a	a	b	b	c	bcd	b	bd	cd	b	0.00294827	0.000436755	0.00103758	0.000425271	0.0851244	0.143747	0.186234	0.0961731	0.130785	0.142157	0.194019	0.0616232
M221.1898T68		[3M+2Na]2+ 132.147	C15H25O	dihydroartemisinic aldehyde_2.3.1.1	REML	0	0.150565	0.0156521	0	0.00256294	0.492499	0.0976961	0.0216039	0.00822456	0.427749	0.112086	0.0224366	0.00433657	d	ab	a	ab	c	bd	a	ab	c	d	ab	ab	0.0395365	0.0124638	0	0.00246095	0.126827	0.055387	0.0067829	0.00460992	0.090943	0.102392	0.0127945	0.00375379
M235.1692T72	[12][M]+		C15H23O2	dihydroepideoxyarteannuin B	REML	0	0.0395823	0.0156963	0.0140304	0.00265417	4.6368	3.43518	3.09236	2.5926	3.30827	3.52311	3.54486	2.49767	a	a	a	a	b	bc	c	c	c	bc	bc	c	0.0238062	0.0114055	0.0275828	0.00233525	1.20492	1.12312	1.05332	0.301446	0.632026	0.940577	1.49473	0.528541
M237.1485T41		[M+H-H20]+ 254.155	C14H21O3	norannuic acid formyl ester_3.4.1.1	REML	0	0.00179333	0.00319105	0.0124761	0.00697681	0.1036	0.172699	0.189719	0.206739	0.0896546	0.160598	0.213844	0.260532	a	a	a	a	bc	d	de	de	b	cd	de	e	0.00320204	0.00465798	0.0130293	0.00628915	0.0315029	0.0561276	0.0642133	0.0322859	0.0314624	0.0361204	0.0934771	0.045323
M237.1484T58			C14H21O3	norannuic acid formyl ester_4.4.1.1	REML	0	0.0277507	0.0383181	0.0767871	0.0796217	0.0117361	0.00213834	0.00623136	0.0227141	0.00714243	0.00535156	0.0103404	0.0161452	ad	a	b	b	cd	c	c	acd	c	c	cd	cd	0.00755986	0.00987813	0.0336754	0.0238713	0.015738	0.00412612	0.00541418	0.00482972	0.00619856	0.00834438	0.00936278	0.00459246
M225.1484T55			C13H21O3	norannuic acid_1.1.1.1	REML	0	0.000327077	0.00970435	0.0180882	0.0365527	0	0.00181473	0.00355988	0.00454907	0	0	0.0019448	0.0032689	d	a	b	c	d	d	d	ad	d	d	d	d	0.00113303	0.0037628	0.00687432	0.0103812	0	0.00378328	0.00316395	0.00278387	0	0	0.00388356	0.00257734
M359.1123T68	[23][M]+		C19H19O7	retusin_1.1.1.1	REML	0	1.73286	0.514016	0.407575	0.489509	0.637417	0.308086	0.218185	0.229361	0.697032	0.326295	0.283867	0.251838	e	abc	abd	abcd	bc	ad	d	ad	c	ad	d	ad	0.325044	0.180905	0.19024	0.113556	0.271022	0.165526	0.0910335	0.0416211	0.100207	0.0917403	0.107402	0.0442616
M193.0493T23	[3][M]+	[M+H]+ 192.042	C10H9O4	scopoletin_1.3.1.1	REML	2.88658e-15	6.0122	1.74794	2.21186	0.245005	4.39892	1.66272	1.83958	0.284035	5.42041	1.56912	2.2677	0.176618	b	a	a	a	b	a	a	a	b	a	a	a	1.14054	0.887911	1.49831	0.170577	1.14579	1.31698	0.627104	0.0959907	3.15981	0.883491	1.42359	0.0722532
M193.0493T19			C10H9O4	scopoletin_2.3.1.1	REML	5.16119e-08	0.965079	0.098056	0.181873	0.00100547	0.697763	0.10213	0.0885659	0.00258707	0.773955	0.11148	0.156237	0.000667227	c	a	ab	a	bc	a	a	ab	c	a	ab	a	0.737556	0.0541588	0.165622	0.00151588	0.640136	0.101936	0.079983	0.00514616	0.80789	0.133428	0.140573	0.00133418
M193.0493T15			C10H9O4	scopoletin_3.3.1.1	REML	1.98841e-13	0.000681339	0	0	0.132505	4.17881e-07	0.000145451	2.1265e-06	0.131042	0	0	1.26464e-05	0.0943754	a	a	a	b	a	a	a	b	a	a	a	b	0.00189869	0	0	0.0811997	1.32145e-06	0.000317215	6.72459e-06	0.0461196	0	0	3.08969e-05	0.031565
M355.1023T14			C16H19O9	scopolin_1.1.1.2	REML	2.22045e-15	0.0244858	0	0.00155909	0.235223	0.00624755	0	0	0.212704	0.000488414	0	0	0.181959	c	a	a	b	ac	ac	ac	b	ac	ac	ac	b	0.0438707	0	0.0038587	0.129181	0.0132033	0	0	0.0765177	0.00143332	0	0	0.0564066
M151.1115T56	[1][M]+		C10H15O	unknown	REML	7.53841e-14	1.08774	0.348799	0.348779	0.280828	1.39365	0.531893	0.462739	0.220725	0.947351	0.340592	0.377254	0.110919	b	a	a	a	b	ac	ac	a	bc	a	a	a	0.625926	0.160527	0.159342	0.135236	0.974593	0.399916	0.297623	0.0897535	0.312007	0.134423	0.168069	0.0729821
M282.2791T96	[20][M]+	[M+K]+ 243.317	C18H36NO	unknown	REML	0	0.0126505	0.0350433	0.0328328	0.371897	0.00681768	0.0377456	0.0252916	1.27749	0.00895996	0.0297619	0.0270188	3.17888	efgh	abcd	abcd	abcdefgh	aceg	bdfh	bdfh	i	bcfg	adeh	adeh	j	0.00341481	0.0111981	0.0180372	0.163461	0.004445	0.0140237	0.0101699	0.742363	0.00277114	0.00962227	0.0120502	0.895821
M551.4250T102	[26][M]+		C40H55O	unknown	REML	0	0.0266133	0.0123092	0.0171593	0.527108	0.0163626	0.0150197	0.0166407	0.501581	0.0170039	0.0144853	0.0202872	0.399072	b	a	ab	c	ab	ab	ab	c	ab	ab	ab	d	0.00699606	0.00833044	0.0112495	0.0492674	0.0076844	0.0134454	0.010118	0.117494	0.00468477	0.00535038	0.0103729	0.114407
M331.1750T88			C16H27O7	unknown	REML	0	0	0	0	0	0.200017	0.0208361	0.0131615	0.0320382	0.269924	0.0378765	0.0305305	0.0376548	a	a	a	ab	c	ab	ab	ab	d	b	ab	ab	0	0	0	0	0.0812354	0.00999409	0.00620839	0.0105888	0.0462964	0.0186152	0.0143376	0.0144102
M404.2062T57		[M+K+NH3]+ 348.216 [M+Na+NH3]+ 364.19 [M+H+NH3]+ 386.172	C22H30NO6	unknown	REML	6.66134e-16	0.0390447	0.077228	0.0415604	0	0.0260272	0.0820685	0.044313	0	0.0306765	0.0671156	0.0493614	0.00337392	b	a	b	c	bcd	a	be	cd	bd	ae	be	cd	0.0214185	0.0285371	0.0191038	0	0.011321	0.0272946	0.0157401	0	0.0111538	0.0195216	0.0210713	0.00580134
M301.1644T47		[M+Na]+ 278.167	C15H25O6	unknown	REML	0	0.0198228	0.124709	0.162109	0.0100165	0	0	0.00140662	0	0	0	0	0	c	a	b	c	c	c	c	c	c	c	c	c	0.0134559	0.0383134	0.0623643	0.00961552	0	0	0.00237681	0	0	0	0	0
M310.3103T101			C20H40NO	unknown	REML	0	0	0	0.00092038	0.0232344	0	0	0	0.142203	0	0	0	0.398118	a	a	a	a	a	a	a	b	a	a	a	c	0	0	0.00318829	0.0215325	0	0	0	0.0935975	0	0	0	0.122585
M256.2633T94			C16H34NO	unknown	REML	0	0.000135645	0	0.00129157	0.0520525	0	0	0	0.144565	0	0	0	0.3494	a	a	a	a	a	a	a	b	a	a	a	c	0.000469888	0	0.00447412	0.0180995	0	0	0	0.0736453	0	0	0	0.0967115
M280.2634T92			C18H34NO	unknown	ANOVA	2.95194e-52	0	0	0	0.0339301	0	0	0	0.129588	0	0	0	0.34928	a	a	a	a	a	a	a	b	a	a	a	c	0	0	0	0.0171581	0	0	0	0.0759201	0	0	0	0.103066
M331.1750T95			C16H27O7	unknown	REML	0	0	0	0	0	0.095657	0.0094084	0.00482775	0.0105951	0.12262	0.0180993	0.0152828	0.00961968	a	a	a	a	b	a	a	a	c	a	a	a	0	0	0	0	0.0443267	0.00524232	0.00330141	0.00627698	0.032739	0.00873675	0.00641295	0.0100491
M439.3569T104			C30H47O2	unknown	REML	2.58682e-14	0.0511844	0.0153512	0.0133506	0.0115776	0.0507529	0.0139918	0.0147711	0.018479	0.036288	0.0141246	0.0119126	0.0226501	c	ab	a	ab	c	ab	ab	ab	bc	a	a	ab	0.0316951	0.0136992	0.012508	0.00854702	0.0322132	0.0125016	0.00925408	0.0100045	0.020053	0.0122555	0.0102262	0.01141
M284.2950T99			C18H38NO	unknown	REML	0	0	0	0.00120042	0.0432103	0	0	0	0.12146	0	0	0	0.260383	a	a	ab	b	ab	ab	ab	c	a	a	a	d	0	0	0.00415838	0.0131421	0	0	0	0.0519853	0	0	0	0.0705066
M223.1691T70		[M+H-COCH2]+ 264.172	C14H23O2	unknown	REML	3.01981e-13	0.0182028	0.0594215	0.0625109	0.0277018	0.00955714	0.0199834	0.0126844	0.000975336	0.00626145	0.011127	0.0106159	0	b	a	a	b	b	b	b	b	b	b	b	b	0.00810405	0.044693	0.0235063	0.0113515	0.00790006	0.00857326	0.00639317	0.00218092	0.00611018	0.00844595	0.0070913	0
M457.3672T98			C30H49O3	unknown	REML	0	0.00642877	0	0	0	0.0691633	0.0237338	0.0104206	0.0231374	0.0482039	0.0218607	0.0124774	0.0245048	abde	a	a	ab	c	d	abe	bde	f	de	abde	de	0.00464671	0	0	0	0.0209327	0.0212753	0.00943037	0.0102962	0.0141827	0.0224283	0.0126894	0.00769543
M164.0703T30			C9H10NO2	unknown	REML	1.59858e-08	0	0.00905416	0.0323275	0.00723591	0	0.0235322	0.052829	0.0149499	0.000447035	0.031615	0.0448989	0.00703972	bd	abcd	ace	abcd	abcd	abcde	e	abcde	bc	ade	e	abcd	0	0.0145574	0.0316269	0.00606867	0	0.0118228	0.0333794	0.0095834	0.00161181	0.0457921	0.0402567	0.0057596
M181.1222T45			C11H17O2	unknown	REML	0	9.51855e-07	0.00116427	0.00603345	0.0793574	0.000672497	0.00200915	0.00559336	0.0797236	0.00165859	0.00342486	0.00365636	0.0839976	ab	ab	cd	e	ac	abcd	bd	e	abcd	abcd	abcd	e	3.29732e-06	0.00122465	0.00397431	0.0258979	0.00160366	0.00286786	0.00279134	0.0160044	0.00192221	0.00290346	0.002987	0.0172971
M425.3773T106		[M+K]+ 386.407	C30H49O	unknown	REML	0	0.0482631	0.00602487	0.0067921	0.00625569	0.038993	0.00273617	0.00227244	0.00547713	0.0308711	0.00364249	0.00374029	0.00687794	c	a	a	a	bc	a	a	a	b	a	a	a	0.0232601	0.00601148	0.00678164	0.00639021	0.0165815	0.00380464	0.00360088	0.00519937	0.0133048	0.00367482	0.0027961	0.00373075
M203.1792T92			C15H23	unknown	REML	0	0.102373	0.023802	0.010013	0.00149714	0	0.00124376	0.00073757	0.000283789	0.0030627	0.000323989	0.00177332	0.000669029	b	a	a	a	a	a	a	a	a	a	a	a	0.0622336	0.0135749	0.00530407	0.00187305	0	0.00252109	0.0012805	0.00041767	0.0110242	0.000819379	0.00229577	0.000988666
M329.1018T76			C18H17O6	unknown	REML	0	0.0438114	0.00555161	0.00603242	0.00907885	0.0237935	0.0029094	0.00344946	0.00239413	0.0331087	0.00577527	0.00321002	0.00833164	c	a	a	a	b	a	a	a	b	a	a	a	0.00977379	0.00653131	0.00473262	0.00447122	0.0117681	0.006152	0.00477233	0.00335635	0.00918055	0.00653293	0.0045437	0.00287175
M273.1486T58		[M+Na]+ 250.162	C17H21O3	unknown	REML	0	0.00211097	0.00187573	0.00199962	0.0642098	0.00482145	0.00371737	0.00300686	0.074072	0.00261548	0.00242332	0.00400299	0.0629397	a	a	a	b	a	a	a	b	a	a	a	b	0.00345456	0.00319718	0.00324283	0.0206545	0.0055732	0.00610021	0.00411016	0.0226872	0.0037441	0.00343756	0.00526592	0.0237483
M551.4249T107			C40H55O	unknown	REML	0	0.000210934	0	0	0.0640833	0	0	0	0.0712636	0	0	0	0.0644465	a	a	a	b	a	a	a	b	a	a	a	b	0.000730696	0	0	0.00964394	0	0	0	0.0117506	0	0	0	0.0163658
M371.2217T86			C23H31O4	unknown	REML	5.30043e-12	0	0.00124388	0.00625748	0.0417447	0	0	0.00889393	0.0758633	0.000462279	0	0.00427018	0.035803	bd	abcd	ac	e	bc	bc	adf	g	abcd	abcd	abcd	ef	0	0.00430894	0.00519484	0.0341773	0	0	0.0109087	0.0233044	0.00166677	0	0.00641047	0.0330667
M853.3789T104			C49H57O13	unknown	ANOVA	3.30453e-35	0	0	0	0.041786	0	0	0	0.0449271	0	0	0	0.0665693	a	a	a	b	a	a	a	b	a	a	a	c	0	0	0	0.0106128	0	0	0	0.0176599	0	0	0	0.038294
M285.1698T43			C15H25O5	unknown	REML	0	0.000360245	0.0104861	0.0251175	0.0762069	0	0	0.000484616	0	0	0	0	0	d	a	b	c	ad	ad	ad	ad	ad	ad	ad	ad	0.00124793	0.00441274	0.00854408	0.0309494	0	0	0.00153249	0	0	0	0	0
M583.4149T93			C40H55O3	unknown	ANOVA	2.81612e-79	0	0	0	0.0451137	0	0	0	0.0381741	0	0	0	0.0337304	a	a	a	b	a	a	a	c	a	a	a	c	0	0	0	0.00655173	0	0	0	0.00772706	0	0	0	0.00703037
M277.2162T77			C18H29O2	unknown	REML	0	0	0	0	0.0344264	0.00470971	0	0	0.0318108	0.0046926	0	0	0.0189542	abcd	abcd	abcd	e	ac	bd	bd	e	bc	ad	ad	f	0	0	0	0.00790693	0.00402557	0	0	0.00885491	0.00498646	0	0	0.00249658
M197.1170T27			C11H17O3	unknown	REML	0	0.000770784	0.000198323	0.00118458	0.0229499	0.00101621	0	0.000193174	0.0287763	0.000542833	0.000743712	0.0010017	0.0356899	a	a	a	b	a	a	a	bc	a	a	a	c	0.00185471	0.000499351	0.0020087	0.011353	0.00217155	0	0.00055736	0.0130496	0.00195721	0.00181814	0.00190292	0.00582513
M289.2522T99			C20H33O	unknown	REML	0	0.0201558	0.00218988	0.000151437	0	0.0127425	0.000640369	0	0	0.0138721	0.00189782	0	0	c	a	a	a	b	a	a	a	b	a	a	a	0.00779505	0.0049567	0.000524592	0	0.00367543	0.00202502	0	0	0.00576564	0.00459754	0	0
M193.1586T75			C13H21O	unknown	ANOVA	3.56086e-61	0	0	0	0.0320954	0	0	0	0.0291398	0	0	0	0.0252684	a	a	a	b	a	a	a	bc	a	a	a	c	0	0	0	0.00782561	0	0	0	0.0060511	0	0	0	0.00838517
M259.2055T92			C18H27O	unknown	ANOVA	2.39271e-62	0	0	0	0.0312191	0	0	0	0.0250128	0	0	0	0.0243516	a	a	a	b	a	a	a	c	a	a	a	c	0	0	0	0.00754233	0	0	0	0.00736184	0	0	0	0.00618033
M585.4302T98			C40H57O3	unknown	REML	2.22045e-16	0.000445674	0	0	0.0260865	0	0	0	0.0217355	0	0	0	0.0164932	a	a	a	b	a	a	a	bc	a	a	a	c	0.00115829	0	0	0.00495441	0	0	0	0.00640188	0	0	0	0.0127648
M254.2476T89			C16H32NO	unknown	ANOVA	6.8984e-45	0	0	0	0	0	0	0	0.00376682	0	0	0	0.0224304	a	a	a	ab	ab	ab	ab	b	a	a	a	c	0	0	0	0	0	0	0	0.00515812	0	0	0	0.00796875

## Sheet: unique
Peak_ID	isotopes	adduct	Formula	Annotation	Statistical model	p-value	AA L1_5	AA L1_5	AA L7_9	AA L7_9	AA L11_13	AA L11_13	AA Dry	AA Dry	GA L1_5	GA L1_5	GA L7_9	GA L7_9	GA L11_13	GA L11_13	GA Dry	GA Dry	GG L1_5	GG L1_5	GG L7_9	GG L7_9	GG L11_13	GG L11_13	GG Dry	GG Dry	AA L1_5	AA L7_9	AA L11_13	AA Dry	GA L1_5	GA L7_9	GA L11_13	GA Dry	GG L1_5	GG L7_9	GG L11_13	GG Dry
M183.0651T36	[2][M]+		C9H11O4	2,4-dihydroxy-6-methoxy acetophenone	REML	0	12.0429	b	1.77733	a	1.6257	a	0.366361	a	12.5449	b	2.1386	a	1.67111	a	0.401935	a	11.8445	b	1.69861	a	1.75287	a	0.383976	a	3.24242	0.697546	0.77848	0.0888661	4.92158	0.398534	0.76273	0.135041	2.74963	0.699766	0.824953	0.0952664
M219.1742T105	[6][M]+		C15H23O	4,7(11)-Amorphadien-12-al	REML	0	0.0825394	e	0.205692	a	0.135929	b	0.0105766	cd	0.0537915	cde	0.215344	a	0.136717	b	0.00752413	cd	0.067422	ce	0.174059	ab	0.144089	b	0.00413912	d	0.0517798	0.0512094	0.0427261	0.00911717	0.0113594	0.0614849	0.0305081	0.00598222	0.0200107	0.0355506	0.039872	0.00387195
M205.1950T87			C15H25	a-guaiene	REML	0	0.146004	e	0.0096052	a	0.00501828	a	0.01054	ab	0.366421	c	0.0775098	b	0.0391193	ab	0.0417491	ab	0.286061	d	0.0759048	b	0.0394379	ab	0.0320367	ab	0.0370184	0.00871347	0.0036739	0.00589976	0.0826888	0.0441495	0.0138972	0.015866	0.067277	0.0722103	0.0260231	0.00506296
M205.1950T102	[5][M]+	[M+Na]+ 182.213	C15H25	amorpha-4,11-diene	REML	2.57264e-09	0.133213	abcf	0.122855	abc	0.191875	d	0.0974899	abce	0.160365	adf	0.122493	abce	0.194134	df	0.0780544	bce	0.130309	abc	0.0970811	be	0.154395	acdf	0.051831	e	0.0374446	0.0488982	0.0667945	0.0276694	0.0274149	0.0471275	0.0738483	0.0233273	0.0325524	0.0337024	0.0548656	0.0243557
M203.1793T82		[M+Na]+ 180.201	C15H23	amorpha-4,11-diene tertiary allylic hydroperoxide	REML	0	1.35375	a	1.13701	a	0.309218	b	0.0197265	c	0	c	0.0286395	c	0.00354963	c	0.00287693	c	0	c	0.000641549	c	0.000492503	c	0.00659052	c	0.331671	0.415868	0.157415	0.0257556	0	0.0355616	0.00471496	0.00643301	0	0.0015103	0.000942431	0.00712671
M233.1535T51			C15H21O2	Annulide	REML	5.9952e-15	0.0104524	ab	0.00563477	ab	0.0045075	a	0.00150701	ab	0.072307	abc	0.16561	d	0.165357	d	0.105123	cd	0.0676261	abc	0.169835	d	0.161008	d	0.0833017	bc	0.00547761	0.00424043	0.00456386	0.00171778	0.0216863	0.0819313	0.0579523	0.0227004	0.0270709	0.111418	0.0522392	0.0145829
M249.1484T50			C15H21O3	arteannuin B	REML	0	0.00125535	a	0.00518755	a	0.00667527	a	0.00164192	a	0.0773308	b	0.115455	bcd	0.127706	cd	0.107135	bcd	0.0777577	bc	0.144044	d	0.194585	e	0.116793	bcd	0.00175688	0.00461353	0.00464836	0.00163945	0.0331281	0.0447632	0.0458594	0.0467588	0.0278675	0.0594055	0.0795604	0.0310352
M251.1641T82		[M+H]+ 250.157	C15H23O3	Arteannuin E/F	REML	0	0	a	0.00128789	a	0.000951346	a	0	ab	0.129906	c	0.248033	d	0.375643	e	0.0233737	abc	0.1029	bc	0.228538	d	0.386163	e	0.0375348	abc	0	0.00191492	0.0012693	0	0.0250095	0.0664456	0.123242	0.0255314	0.0309753	0.0730115	0.152817	0.0192558
M283.1538T49			C15H23O5	Arteannuin G	REML	0	0.0110434	c	0.0659456	abc	0.095591	abd	0.0179333	ac	0.14103	bd	0.372723	e	0.118	bd	0.00190367	ac	0.110686	bd	0.345784	e	0.161161	d	0.00194616	c	0.00626408	0.023296	0.0301971	0.00687914	0.0492129	0.115287	0.0766836	0.00200453	0.0387501	0.0970461	0.0661349	0.00217313
M269.1748T53		[M+K+HCOOH]+ 184.206 [M+Na+HCOOH]+ 200.18 [M+H+HCOOH]+ 222.162	C15H25O4	Arteannuin M/O	REML	0	0	a	0.00103516	a	0.00297711	a	0.000936059	a	0.2365	b	0.462717	cd	0.565768	ce	0.446827	cd	0.223392	b	0.453609	cd	0.63911	e	0.372104	bd	0	0.00144827	0.00288779	0.00232729	0.0561051	0.111285	0.132845	0.149992	0.0643536	0.109706	0.207774	0.17503
M221.1535T43	[10][M]+	[M+H-H20]+ 238.158	C14H21O2	Arteannuin X	REML	0	0.892924	d	2.58356	a	3.67018	b	2.28417	a	0.125657	c	0.277673	cd	0.295497	cd	0.160734	cd	0.0326265	c	0.0791045	c	0.108557	c	0.0444917	c	0.267643	0.910744	1.24198	0.700235	0.0325806	0.0791251	0.0934109	0.0103265	0.00860111	0.0237712	0.0500961	0.0112374
M389.1228T61			C20H21O8	artemetin	REML	0	0.594614	e	0.226062	abc	0.174113	abd	0.124137	abd	0.330648	c	0.0963247	bd	0.0417682	d	0.0451159	bd	0.264444	ac	0.0693008	d	0.0382331	d	0.0315378	d	0.234402	0.142092	0.0904945	0.0339428	0.14144	0.051642	0.0518443	0.0254869	0.0919123	0.0699416	0.0418016	0.0340173
M235.1692T84			C15H23O2	artemisinic acid	REML	0	0.122634	ab	0.101488	ab	0.0806466	a	0.03406	a	1.3657	c	0.558194	d	0.246822	ab	0.247629	abd	1.13519	c	0.587948	d	0.361166	bd	0.159328	ab	0.0354899	0.0748094	0.0565486	0.0226558	0.351058	0.295647	0.104458	0.0353044	0.308295	0.354955	0.172018	0.0825689
M283.1540T61	[21][M]+	[M+K]+ 244.182	C15H23O5	artemisinin	REML	0	0.0111679	a	0.00729806	a	0.0349075	a	0.0136698	ab	2.41078	b	8.07988	cd	10.4205	ef	9.93719	cef	2.00898	ab	6.49294	d	11.0818	e	8.6335	cdf	0.00838444	0.00763558	0.0590617	0.00873884	0.483219	1.0552	3.37658	1.21061	0.475208	1.80778	3.04432	1.074
M153.1271T56			C10H17O	camphor	REML	7.25701e-10	0.100571	bcd	0.046267	a	0.0444164	a	0.0265825	ab	0.128945	cd	0.075563	ab	0.0763441	ab	0.0549857	abc	0.162064	d	0.0953168	abc	0.092402	abc	0.0340829	ab	0.0683138	0.0305798	0.0357789	0.00796342	0.101213	0.061529	0.0737688	0.0527093	0.0884325	0.0520721	0.0498911	0.036373
M375.1072T54	[24][M]+		C19H19O8	casticin	REML	0	3.60691	c	1.40332	ab	1.10797	ab	0.635075	a	3.57708	c	1.68011	b	1.2515	ab	0.937539	ab	2.86785	c	1.40419	ab	1.31159	ab	0.791232	ab	0.764969	0.735678	0.640556	0.247036	0.972328	0.745478	0.435731	0.178076	0.641092	0.724719	0.563188	0.137573
M361.0918T46		[3M+2Na+2K-H]3+ 320.117	C18H17O8	chrysoplenol C	REML	6.63901e-08	0.393528	abce	0.150142	abc	0.128762	ab	0.0498613	b	0.851048	d	0.512592	ce	0.375418	abce	0.288266	abce	0.628744	de	0.46258	ace	0.458362	abce	0.194041	abc	0.171081	0.100222	0.133387	0.0371996	0.408497	0.202228	0.233875	0.118591	0.394915	0.45205	0.306584	0.0854713
M267.1590T63		[M+Na]+ 244.182	C15H23O4	deoxyartemisinin	REML	0	0.00207942	a	0.000622955	a	0.00268609	a	0.0035857	ab	0.154994	cd	0.315537	ef	0.403113	eg	0.594629	h	0.121449	bc	0.264101	df	0.446854	gh	0.792662	i	0.00368908	0.00127185	0.00349617	0.00387477	0.0259545	0.072128	0.118819	0.0443031	0.0360068	0.0641412	0.194829	0.167373
M237.1847T84	[15][M]+		C15H25O2	dihydroartemisinic acid	REML	0	0.801742	a	0.620044	a	0.335586	a	0.109304	a	9.4283	b	3.0174	c	1.43668	ac	1.00598	ac	8.45128	b	2.93581	c	1.78532	ac	0.987362	ac	0.344722	0.312837	0.200907	0.0381553	2.84092	1.45733	0.549368	0.42837	2.33541	2.83921	1.02561	0.35871
M235.1693T59	[11][M]+		C15H23O2	dihydroartemisinic acid tertiary allylic hydroperoxide	REML	0	0.0169872	a	0.0106201	a	0.0162349	a	0.0279176	a	3.88157	bc	5.08205	d	1.21361	ae	0.0960712	a	3.46674	b	4.7348	cd	1.60757	e	0.0609657	a	0.00846853	0.00774366	0.00727705	0.00997674	0.90093	1.66282	0.603392	0.014335	0.751116	1.84098	0.543189	0.0202997
M235.1692T72	[12][M]+		C15H23O2	dihydroepideoxyarteannuin B	REML	0	0.0395823	a	0.0156963	a	0.0140304	a	0.00265417	a	4.6368	b	3.43518	bc	3.09236	c	2.5926	c	3.30827	c	3.52311	bc	3.54486	bc	2.49767	c	0.0238062	0.0114055	0.0275828	0.00233525	1.20492	1.12312	1.05332	0.301446	0.632026	0.940577	1.49473	0.528541
M225.1484T55			C13H21O3	norannuic acid	REML	0	0.000327077	d	0.00970435	a	0.0180882	b	0.0365527	c	0	d	0.00181473	d	0.00355988	d	0.00454907	ad	0	d	0	d	0.0019448	d	0.0032689	d	0.00113303	0.0037628	0.00687432	0.0103812	0	0.00378328	0.00316395	0.00278387	0	0	0.00388356	0.00257734
M237.1485T41		[M+H-H20]+ 254.155	C14H21O3	norannuic acid formyl ester	REML	0	0.00179333	a	0.00319105	a	0.0124761	a	0.00697681	a	0.1036	bc	0.172699	d	0.189719	de	0.206739	de	0.0896546	b	0.160598	cd	0.213844	de	0.260532	e	0.00320204	0.00465798	0.0130293	0.00628915	0.0315029	0.0561276	0.0642133	0.0322859	0.0314624	0.0361204	0.0934771	0.045323
M359.1123T68	[23][M]+		C19H19O7	retusin	REML	0	1.73286	e	0.514016	abc	0.407575	abd	0.489509	abcd	0.637417	bc	0.308086	ad	0.218185	d	0.229361	ad	0.697032	c	0.326295	ad	0.283867	d	0.251838	ad	0.325044	0.180905	0.19024	0.113556	0.271022	0.165526	0.0910335	0.0416211	0.100207	0.0917403	0.107402	0.0442616
M193.0493T23	[3][M]+	[M+H]+ 192.042	C10H9O4	scopoletin	REML	2.88658e-15	6.0122	b	1.74794	a	2.21186	a	0.245005	a	4.39892	b	1.66272	a	1.83958	a	0.284035	a	5.42041	b	1.56912	a	2.2677	a	0.176618	a	1.14054	0.887911	1.49831	0.170577	1.14579	1.31698	0.627104	0.0959907	3.15981	0.883491	1.42359	0.0722532
M355.1023T14			C16H19O9	scopolin	REML	2.22045e-15	0.0244858	c	0	a	0.00155909	a	0.235223	b	0.00624755	ac	0	ac	0	ac	0.212704	b	0.000488414	ac	0	ac	0	ac	0.181959	b	0.0438707	0	0.0038587	0.129181	0.0132033	0	0	0.0765177	0.00143332	0	0	0.0564066
M151.1115T56	[1][M]+		C10H15O	unknown	REML	7.53841e-14	1.08774	b	0.348799	a	0.348779	a	0.280828	a	1.39365	b	0.531893	ac	0.462739	ac	0.220725	a	0.947351	bc	0.340592	a	0.377254	a	0.110919	a	0.625926	0.160527	0.159342	0.135236	0.974593	0.399916	0.297623	0.0897535	0.312007	0.134423	0.168069	0.0729821
M181.1222T45			C11H17O2	unknown	REML	0	9.51855e-07	ab	0.00116427	ab	0.00603345	cd	0.0793574	e	0.000672497	ac	0.00200915	abcd	0.00559336	bd	0.0797236	e	0.00165859	abcd	0.00342486	abcd	0.00365636	abcd	0.0839976	e	3.29732e-06	0.00122465	0.00397431	0.0258979	0.00160366	0.00286786	0.00279134	0.0160044	0.00192221	0.00290346	0.002987	0.0172971
M197.1170T27			C11H17O3	unknown	REML	0	0.000770784	a	0.000198323	a	0.00118458	a	0.0229499	b	0.00101621	a	0	a	0.000193174	a	0.0287763	bc	0.000542833	a	0.000743712	a	0.0010017	a	0.0356899	c	0.00185471	0.000499351	0.0020087	0.011353	0.00217155	0	0.00055736	0.0130496	0.00195721	0.00181814	0.00190292	0.00582513
M193.1586T75			C13H21O	unknown	ANOVA	3.56086e-61	0	a	0	a	0	a	0.0320954	b	0	a	0	a	0	a	0.0291398	bc	0	a	0	a	0	a	0.0252684	c	0	0	0	0.00782561	0	0	0	0.0060511	0	0	0	0.00838517
M223.1691T70		[M+H-COCH2]+ 264.172	C14H23O2	unknown	REML	3.01981e-13	0.0182028	b	0.0594215	a	0.0625109	a	0.0277018	b	0.00955714	b	0.0199834	b	0.0126844	b	0.000975336	b	0.00626145	b	0.011127	b	0.0106159	b	0	b	0.00810405	0.044693	0.0235063	0.0113515	0.00790006	0.00857326	0.00639317	0.00218092	0.00611018	0.00844595	0.0070913	0
M203.1792T92			C15H23	unknown	REML	0	0.102373	b	0.023802	a	0.010013	a	0.00149714	a	0	a	0.00124376	a	0.00073757	a	0.000283789	a	0.0030627	a	0.000323989	a	0.00177332	a	0.000669029	a	0.0622336	0.0135749	0.00530407	0.00187305	0	0.00252109	0.0012805	0.00041767	0.0110242	0.000819379	0.00229577	0.000988666
M285.1698T43			C15H25O5	unknown	REML	0	0.000360245	d	0.0104861	a	0.0251175	b	0.0762069	c	0	ad	0	ad	0.000484616	ad	0	ad	0	ad	0	ad	0	ad	0	ad	0.00124793	0.00441274	0.00854408	0.0309494	0	0	0.00153249	0	0	0	0	0
M301.1644T47		[M+Na]+ 278.167	C15H25O6	unknown	REML	0	0.0198228	c	0.124709	a	0.162109	b	0.0100165	c	0	c	0	c	0.00140662	c	0	c	0	c	0	c	0	c	0	c	0.0134559	0.0383134	0.0623643	0.00961552	0	0	0.00237681	0	0	0	0	0
M331.1750T88			C16H27O7	unknown	REML	0	0	a	0	a	0	a	0	ab	0.200017	c	0.0208361	ab	0.0131615	ab	0.0320382	ab	0.269924	d	0.0378765	b	0.0305305	ab	0.0376548	ab	0	0	0	0	0.0812354	0.00999409	0.00620839	0.0105888	0.0462964	0.0186152	0.0143376	0.0144102
M331.1750T95			C16H27O7	unknown	REML	0	0	a	0	a	0	a	0	a	0.095657	b	0.0094084	a	0.00482775	a	0.0105951	a	0.12262	c	0.0180993	a	0.0152828	a	0.00961968	a	0	0	0	0	0.0443267	0.00524232	0.00330141	0.00627698	0.032739	0.00873675	0.00641295	0.0100491
M254.2476T89			C16H32NO	unknown	ANOVA	6.8984e-45	0	a	0	a	0	a	0	ab	0	ab	0	ab	0	ab	0.00376682	b	0	a	0	a	0	a	0.0224304	c	0	0	0	0	0	0	0	0.00515812	0	0	0	0.00796875
M256.2633T94			C16H34NO	unknown	REML	0	0.000135645	a	0	a	0.00129157	a	0.0520525	a	0	a	0	a	0	a	0.144565	b	0	a	0	a	0	a	0.3494	c	0.000469888	0	0.00447412	0.0180995	0	0	0	0.0736453	0	0	0	0.0967115
M273.1486T58		[M+Na]+ 250.162	C17H21O3	unknown	REML	0	0.00211097	a	0.00187573	a	0.00199962	a	0.0642098	b	0.00482145	a	0.00371737	a	0.00300686	a	0.074072	b	0.00261548	a	0.00242332	a	0.00400299	a	0.0629397	b	0.00345456	0.00319718	0.00324283	0.0206545	0.0055732	0.00610021	0.00411016	0.0226872	0.0037441	0.00343756	0.00526592	0.0237483
M329.1018T76			C18H17O6	unknown	REML	0	0.0438114	c	0.00555161	a	0.00603242	a	0.00907885	a	0.0237935	b	0.0029094	a	0.00344946	a	0.00239413	a	0.0331087	b	0.00577527	a	0.00321002	a	0.00833164	a	0.00977379	0.00653131	0.00473262	0.00447122	0.0117681	0.006152	0.00477233	0.00335635	0.00918055	0.00653293	0.0045437	0.00287175
M259.2055T92			C18H27O	unknown	ANOVA	2.39271e-62	0	a	0	a	0	a	0.0312191	b	0	a	0	a	0	a	0.0250128	c	0	a	0	a	0	a	0.0243516	c	0	0	0	0.00754233	0	0	0	0.00736184	0	0	0	0.00618033
M277.2162T77			C18H29O2	unknown	REML	0	0	abcd	0	abcd	0	abcd	0.0344264	e	0.00470971	ac	0	bd	0	bd	0.0318108	e	0.0046926	bc	0	ad	0	ad	0.0189542	f	0	0	0	0.00790693	0.00402557	0	0	0.00885491	0.00498646	0	0	0.00249658
M280.2634T92			C18H34NO	unknown	ANOVA	2.95194e-52	0	a	0	a	0	a	0.0339301	a	0	a	0	a	0	a	0.129588	b	0	a	0	a	0	a	0.34928	c	0	0	0	0.0171581	0	0	0	0.0759201	0	0	0	0.103066
M282.2791T96	[20][M]+	[M+K]+ 243.317	C18H36NO	unknown	REML	0	0.0126505	efgh	0.0350433	abcd	0.0328328	abcd	0.371897	abcdefgh	0.00681768	aceg	0.0377456	bdfh	0.0252916	bdfh	1.27749	i	0.00895996	bcfg	0.0297619	adeh	0.0270188	adeh	3.17888	j	0.00341481	0.0111981	0.0180372	0.163461	0.004445	0.0140237	0.0101699	0.742363	0.00277114	0.00962227	0.0120502	0.895821
M284.2950T99			C18H38NO	unknown	REML	0	0	a	0	a	0.00120042	ab	0.0432103	b	0	ab	0	ab	0	ab	0.12146	c	0	a	0	a	0	a	0.260383	d	0	0	0.00415838	0.0131421	0	0	0	0.0519853	0	0	0	0.0705066
M289.2522T99			C20H33O	unknown	REML	0	0.0201558	c	0.00218988	a	0.000151437	a	0	a	0.0127425	b	0.000640369	a	0	a	0	a	0.0138721	b	0.00189782	a	0	a	0	a	0.00779505	0.0049567	0.000524592	0	0.00367543	0.00202502	0	0	0.00576564	0.00459754	0	0
M310.3103T101			C20H40NO	unknown	REML	0	0	a	0	a	0.00092038	a	0.0232344	a	0	a	0	a	0	a	0.142203	b	0	a	0	a	0	a	0.398118	c	0	0	0.00318829	0.0215325	0	0	0	0.0935975	0	0	0	0.122585
M404.2062T57		[M+K+NH3]+ 348.216 [M+Na+NH3]+ 364.19 [M+H+NH3]+ 386.172	C22H30NO6	unknown	REML	6.66134e-16	0.0390447	b	0.077228	a	0.0415604	b	0	c	0.0260272	bcd	0.0820685	a	0.044313	be	0	cd	0.0306765	bd	0.0671156	ae	0.0493614	be	0.00337392	cd	0.0214185	0.0285371	0.0191038	0	0.011321	0.0272946	0.0157401	0	0.0111538	0.0195216	0.0210713	0.00580134
M371.2217T86			C23H31O4	unknown	REML	5.30043e-12	0	bd	0.00124388	abcd	0.00625748	ac	0.0417447	e	0	bc	0	bc	0.00889393	adf	0.0758633	g	0.000462279	abcd	0	abcd	0.00427018	abcd	0.035803	ef	0	0.00430894	0.00519484	0.0341773	0	0	0.0109087	0.0233044	0.00166677	0	0.00641047	0.0330667
M439.3569T104			C30H47O2	unknown	REML	2.58682e-14	0.0511844	c	0.0153512	ab	0.0133506	a	0.0115776	ab	0.0507529	c	0.0139918	ab	0.0147711	ab	0.018479	ab	0.036288	bc	0.0141246	a	0.0119126	a	0.0226501	ab	0.0316951	0.0136992	0.012508	0.00854702	0.0322132	0.0125016	0.00925408	0.0100045	0.020053	0.0122555	0.0102262	0.01141
M425.3773T106		[M+K]+ 386.407	C30H49O	unknown	REML	0	0.0482631	c	0.00602487	a	0.0067921	a	0.00625569	a	0.038993	bc	0.00273617	a	0.00227244	a	0.00547713	a	0.0308711	b	0.00364249	a	0.00374029	a	0.00687794	a	0.0232601	0.00601148	0.00678164	0.00639021	0.0165815	0.00380464	0.00360088	0.00519937	0.0133048	0.00367482	0.0027961	0.00373075
M457.3672T98			C30H49O3	unknown	REML	0	0.00642877	abde	0	a	0	a	0	ab	0.0691633	c	0.0237338	d	0.0104206	abe	0.0231374	bde	0.0482039	f	0.0218607	de	0.0124774	abde	0.0245048	de	0.00464671	0	0	0	0.0209327	0.0212753	0.00943037	0.0102962	0.0141827	0.0224283	0.0126894	0.00769543
M551.4250T102	[26][M]+		C40H55O	unknown	REML	0	0.0266133	b	0.0123092	a	0.0171593	ab	0.527108	c	0.0163626	ab	0.0150197	ab	0.0166407	ab	0.501581	c	0.0170039	ab	0.0144853	ab	0.0202872	ab	0.399072	d	0.00699606	0.00833044	0.0112495	0.0492674	0.0076844	0.0134454	0.010118	0.117494	0.00468477	0.00535038	0.0103729	0.114407
M551.4249T107			C40H55O	unknown	REML	0	0.000210934	a	0	a	0	a	0.0640833	b	0	a	0	a	0	a	0.0712636	b	0	a	0	a	0	a	0.0644465	b	0.000730696	0	0	0.00964394	0	0	0	0.0117506	0	0	0	0.0163658
M583.4149T93			C40H55O3	unknown	ANOVA	2.81612e-79	0	a	0	a	0	a	0.0451137	b	0	a	0	a	0	a	0.0381741	c	0	a	0	a	0	a	0.0337304	c	0	0	0	0.00655173	0	0	0	0.00772706	0	0	0	0.00703037
M585.4302T98			C40H57O3	unknown	REML	2.22045e-16	0.000445674	a	0	a	0	a	0.0260865	b	0	a	0	a	0	a	0.0217355	bc	0	a	0	a	0	a	0.0164932	c	0.00115829	0	0	0.00495441	0	0	0	0.00640188	0	0	0	0.0127648
M853.3789T104			C49H57O13	unknown	ANOVA	3.30453e-35	0	a	0	a	0	a	0.041786	b	0	a	0	a	0	a	0.0449271	b	0	a	0	a	0	a	0.0665693	c	0	0	0	0.0106128	0	0	0	0.0176599	0	0	0	0.038294
M164.0703T30			C9H10NO2	unknown	REML	1.59858e-08	0	bd	0.00905416	abcd	0.0323275	ace	0.00723591	abcd	0	abcd	0.0235322	abcde	0.052829	e	0.0149499	abcde	0.000447035	bc	0.031615	ade	0.0448989	e	0.00703972	abcd	0	0.0145574	0.0316269	0.00606867	0	0.0118228	0.0333794	0.0095834	0.00161181	0.0457921	0.0402567	0.0057596

## Sheet: supp
Supplementary table S4: Comparison of solvent extract methods (chloroform:ethanol vs methanol:water) for flavonoid detection over an extended UPLC-MS run time of extracts from wild type and chi1-1 mutant
Table legend
CE - Chloroform:Ethanol (9:1 v/v) extraction solvent
MW - Methanol:Water (85:15 v/v) extraction solvent
WT - wild type dry leaf material
Hom - homozygous chi1-1 dry leaf material
Genotype - WT or Hom
Solvent - CE or MW
ANOVA - analysis of variance
µg/mg DW - average of dry weight normalised concentration
Statistics were performed on log-transformed data, with p < 0.05 classed as Significant
Significant extraction solvent effects are highlighted in yellow
Flavonoids are defined as any matches to the 23 unique flavone and flavonol formulae (derived from 40 compounds) reported by Ferreira et al (2010), or identified by ourselves
Peak_ID	Formula	Annotation	Flavonoid	max % total	Solvent CE mean values (µg/mg DW)		Solvent MW mean values (µg/mg DW)		Two-way ANOVA p value		Significant		log2 fold-change
					WT	Hom chi1-1	WT	Hom chi1-1	Genotype	Solvent	Genotype	Solvent	Genotype (sum Hom chi1-1 / WT)	Solvent (sum MW / WE)
M375.1075T107	C19H19O8	casticin	Yes	2.82876	0.857991	0	0.873177	0	2.45045e-32	0.822439	Yes	No	-999	0.0253114
M361.0916T99	C18H17O8	chrysoplenol C/D (putative)	Yes	0.778079	0.240176	0	0.235082	0	1.08174e-34	0.750746	Yes	No	-999	-0.0309305
M359.1122T120	C19H19O7	dehydroxycasticin	Yes	0.515843	0.152081	0	0.159229	0	4.92577e-35	0.347613	Yes	No	-999	0.066265
M359.0761T99	C18H15O8	dehydro chrysoplenol C/D (putative)	Yes	0.13787	0.0425575	0	0.0120259	0	1.75156e-24	7.87808e-06	Yes	Yes	-999	-1.82327
M345.0963T106	C18H17O7	cirsilineol (putative)	Yes	0.0985364	0.0283216	0	0.030416	0	6.83988e-25	0.643121	Yes	No	-999	0.102929
M375.1071T112	C19H19O8	chrysosplenetin	Yes	0.0212326	0.00512519	0	0.00655404	0	1.92885e-07	0.465806	Yes	No	-999	0.35478
M283.1540T113	C15H23O5	artemisinin	No	33.3431	10.2923	9.23747	8.78337	9.81602	0.944693	0.350973	No	No	-0.00167772	-0.0704188
M235.1693T124	C15H23O2	dihydroepideoxyarteannuin B	No	8.60579	1.67467	2.41497	1.43801	2.65642	0.0208557	0.746509	Yes	No	0.704227	0.00168832
M193.0494T66	C10H9O4	scopoletin	No	5.79293	0.333266	0.533726	1.72838	1.78815	0.00278055	1.18034e-12	Yes	Yes	0.171497	2.02006
M267.1590T115	C15H23O4	deoxyartemisinin	No	5.42096	1.59099	1.507	1.67333	1.58481	0.524563	0.525562	No	No	-0.0783336	0.072713
M237.1485T93	C14H21O3	Unknown	No	2.41953	0.575642	0.746856	0.496308	0.631413	0.000274735	0.0108909	Yes	Yes	0.36262	-0.229855
M251.1639T101	C15H23O3	arteannuin E/F/K/N (putative)	No	1.47099	0.346893	0.447901	0.405475	0.454062	0.00793286	0.15898	Yes	No	0.261629	0.112979
M181.1221T96	C11H17O2	Unknown	No	1.42706	0.24755	0.36305	0.283799	0.440504	1.76976e-07	0.00283727	Yes	Yes	0.596734	0.246366
M527.3940T148	C30H55O7	Unknown	No	1.42524	0	0.43994	1.10937e-06	0.401456	4.71457e-18	0.386865	Yes	No	19.5327	-0.132062
M345.1177T70	C15H21O9	Unknown	No	1.39602	0.021554	0.000534763	0.430921	0.100537	2.76029e-05	1.11179e-06	Yes	Yes	-2.16246	4.58857
M571.4202T147	C32H59O8	Unknown	No	1.39481	0	0.430549	0	0.368824	5.06687e-26	0.293584	Yes	No	999	-0.223247
M419.3880T183	C28H51O2	Unknown	No	1.28764	0.143271	0.397467	0.0544306	0.0435547	0.123802	1.3858e-06	No	Yes	1.15753	-2.46429
M277.2162T129	C18H29O2	Unknown	No	1.27068	0.156807	0.39223	0.192421	0.386673	5.6675e-10	0.136871	Yes	No	1.15728	0.0768931
M551.4244T154	C40H55O	Unknown	No	1.18568	0.205321	0.365993	0.0487342	0.0916753	1.35818e-06	6.8782e-12	Yes	Yes	0.849161	-2.02464
M269.1749T105	C15H25O4	arteannuin M/O (putative)	No	1.14605	0.353761	0.326257	0.288365	0.326779	0.694279	0.18484	No	No	0.0243052	-0.144647
M193.0493T51	C10H9O4	Unknown	No	1.14192	0.0155996	0.00214053	0.352487	0.0173969	0.448801	0.0048838	No	Yes	-4.23573	4.38198
M376.2592T111	C23H36O4	Unknown	No	1.12042	0.34585	0.341718	0	0	0.368254	1.33847e-07	No	Yes	-0.0173396	-999
M251.1640T104	C15H23O3	arteannuin E/F/K/N (putative)	No	1.07263	0.258098	0.133591	0.331097	0.16157	0.0212487	0.299498	Yes	No	-0.997243	0.330902
M783.6896T179	C51H91O5	Unknown	No	0.981785	0.0718563	0.155886	0.303056	0.14361	0.797822	0.0419429	No	Yes	-0.324016	0.971793
M483.3680T148	C28H51O6	Unknown	No	0.952341	0	0.291896	0	0.293967	8.63678e-27	0.876793	Yes	No	999	0.0102016
M283.1540T87	C15H23O5	arteannuin U/W (putative)	No	0.905378	0.100418	0.279471	0.0995594	0.246239	1.88841e-09	0.392061	Yes	No	1.39443	-0.135646
M615.4473T147	C34H63O9	Unknown	No	0.783996	0	0.23497	0	0.242002	1.14133e-22	0.837072	Yes	No	999	0.0425441
M183.0650T85	C9H11O4	2,4-dihydroxy-6-methoxy acetophenone	No	0.782377	0.193857	0.241503	0.0233568	0.0229265	0.260438	0.00452115	No	Yes	0.283769	-3.23364
M251.1640T106	C15H23O3	arteannuin E/F/K/N (putative)	No	0.762154	0.21572	0.185861	0.23526	0.18949	0.142043	0.906552	No	No	-0.264824	0.0809245
M235.1693T115	C15H23O2	arteannuin I/J (putative)	No	0.689298	0.19163	0.0589732	0.212771	0.0941292	9.28078e-06	0.0903024	Yes	No	-1.40129	0.292368
M429.3722T165	C29H49O2	Unknown	No	0.686918	0.138824	0.212037	0.076601	0.0766527	0.00769089	3.68509e-09	Yes	Yes	0.422333	-1.19498
M269.1748T103	C15H25O4	arteannuin M/O (putative)	No	0.680711	0.149693	0.186837	0.145583	0.210121	0.000168166	0.465088	Yes	No	0.426921	0.079941
M659.4729T147	C36H67O10	Unknown	No	0.647515	0	0.191592	0	0.199874	6.41508e-27	0.695565	Yes	No	999	0.0610568
M235.1692T128	C15H23O2	artemisinic acid	No	0.634256	0.139899	0.0897547	0.195781	0.122954	0.00225292	0.0225241	Yes	Yes	-0.65821	0.472898
M439.3416T148	C26H47O5	Unknown	No	0.610312	0	0.180785	0	0.18839	1.64405e-27	0.796614	Yes	No	999	0.0594447
M223.0743T70	C15H11O2	Unknown	No	0.552444	0.0228898	0.107907	0.0670629	0.170527	4.47437e-10	3.61294e-07	Yes	Yes	1.6301	0.861148
M871.5741T170	C54H79O9	Unknown	No	0.490449	0.0363046	0.0610327	0.0343648	0.151391	0.0187451	0.0391889	Yes	Yes	1.58779	0.932342
M419.3879T179	C28H51O2	Unknown	No	0.413873	0.0619712	0.127753	0.0263121	0.0247732	0.0393035	1.26763e-07	Yes	Yes	0.78885	-1.89293
M213.1484T110	C12H21O3	Unknown	No	0.399622	0.0102992	0.123355	0.011185	0.120956	0.00577598	0.380898	Yes	No	3.50737	-0.0164249
M369.1177T62	C17H21O9	Unknown	No	0.388478	0	0	0.119915	0.0316976	0.149644	5.99651e-08	No	Yes	-1.91956	999
M237.1848T116	C15H25O2	amorpha-4,11-diene tertiary allylic hydroperoxide/dihydroartemisinic acid (putative)	No	0.382875	0.0590945	0.0282163	0.118185	0.041191	0.010466	0.0494429	Yes	Yes	-1.35287	0.868205
M183.0649T70	C9H11O4	Unknown	No	0.349419	0.00803109	0	0.107858	0.0167546	1.70687e-13	1.88883e-14	Yes	Yes	-2.79012	3.95571
M249.1483T99	C15H21O3	arteannuin B (putative)	No	0.348476	0.0376756	0.107567	0.0277155	0.0780619	6.54311e-06	0.0652498	Yes	No	1.50526	-0.457434
M703.4997T147	C38H71O11	Unknown	No	0.320487	0	0.0791259	0	0.0989275	1.5332e-23	0.258345	Yes	No	999	0.322223
M273.1485T110	C17H21O3	Unknown	No	0.314967	0.0606073	0	0.0972235	0	5.85867e-28	0.00347518	Yes	Yes	-999	0.681813
M211.1328T104	C12H19O3	Unknown	No	0.314246	0.00524383	0.097001	0.00606386	0.0785202	0.00274945	0.953662	Yes	No	3.95627	-0.27357
M872.5763T169	C54H80O9	Unknown	No	0.302673	0.00910763	0.0114867	0.00376493	0.0934284	0.0780591	0.0632648	No	No	3.02685	2.23861
M513.3779T145	C29H53O7	Unknown	No	0.299412	0	0.092422	0	0.0676064	3.39378e-25	0.090671	Yes	No	999	-0.451077
M249.1483T102	C15H21O3	Unknown	No	0.292509	0.0818802	0.0186111	0.0902913	0.0135894	8.87327e-05	0.839564	Yes	No	-2.41869	0.0478566
M360.1499T13	C27H20O	Unknown	No	0.268738	0	0	0.0829536	0.0335938	0.00161448	1.72899e-24	Yes	Yes	-1.30411	999
M431.1183T79	C18H23O12	Unknown	No	0.265309	0	0	0.081895	0	5.67302e-23	5.67302e-23	Yes	Yes	-999	999
M283.1902T106	C16H27O4	Unknown	No	0.264218	0.0789882	0.0797788	0.0792383	0.0815583	0.771	0.833412	No	No	0.0280865	0.0183269
M151.1115T107	C10H15O	Unknown	No	0.263322	0.0070152	0.0812818	0.0139304	0.0785764	0.0100891	0.497795	Yes	No	2.93208	0.067195
M613.4825T172	C39H65O5	Unknown	No	0.262165	0.0172442	0.0809247	0.0235234	0.0490462	5.12943e-07	0.624704	Yes	No	1.67269	-0.435901
M395.3888T177	C26H51O2	Unknown	No	0.258878	0.040141	0.0799099	0.0111683	0.0158513	0.0186817	1.09028e-06	Yes	Yes	0.900219	-2.15156
M219.1743T122	C15H23O	4,7(11)-amorphadien-12-al/4(15),11-amorphadien-9-one (putative)	No	0.253961	0.0708912	0.0658751	0.0783921	0.0628631	0.0590506	0.795919	No	No	-0.213612	0.0465918
M599.4460T154	C41H59O3	Unknown	No	0.24416	0.0479822	0.0753668	0.00841506	0.0174016	0.168974	0.024455	No	Yes	0.718008	-2.25637
M555.5135T153	C38H67O2	Unknown	No	0.240929	0.012655	0.0743696	0.00857123	0.0665294	0.0276083	0.600083	Yes	No	2.73074	-0.212597
M283.1539T96	C15H23O5	arteannuin U/W (putative)	No	0.227688	0.0334888	0.0702823	0.0365933	0.0569352	0.000826945	0.706953	Yes	No	0.860179	-0.149927
M163.1115T133	C11H15O	Unknown	No	0.222602	0.0458419	0.0561793	0.0557578	0.0687125	0.173947	0.0777915	No	No	0.297784	0.286932
M267.1589T92	C15H23O4	Unknown	No	0.222507	0.0686832	0.0217326	0.0394654	0.0356205	0.00799316	0.95022	Yes	No	-0.915068	-0.268033
M227.1277T65	C12H19O4	Unknown	No	0.220957	0	0.0178973	0.0133687	0.0682047	1.30781e-18	3.61338e-18	Yes	Yes	2.68719	2.18836
M237.1483T110	C14H21O3	Unknown	No	0.210613	0.052766	0.0577298	0.0504645	0.0650116	0.0750858	0.796787	No	No	0.249754	0.063603
M167.1063T91	C10H15O2	Unknown	No	0.201948	0.0130918	0.062337	0.00986236	0.0582928	2.70315e-10	0.18299	Yes	No	2.39376	-0.146293
M203.1793T135	C15H23	amorpha-4,11-diene hydroperoxide (putative)	No	0.201791	0.0537655	0.0619582	0.0621803	0.0622886	0.738613	0.706152	No	No	0.0997586	0.1051
M169.1221T89	C10H17O2	Unknown	No	0.2008	0.0380825	0.0619826	0.0189238	0.0426003	5.87707e-05	0.000294459	Yes	Yes	0.875452	-0.701716
M613.4827T164	C39H65O5	Unknown	No	0.200582	0.0224689	0.0619153	0.0205938	0.0310772	1.57772e-07	0.000140739	Yes	Yes	1.11068	-0.70762
M391.3570T170	C26H47O2	Unknown	No	0.19688	0.0333028	0.0607726	0.0302112	0.019816	0.750119	0.00280128	No	Yes	0.3435	-0.911105
M295.2270T133	C18H31O3	Unknown	No	0.193826	0.0208857	0.0546659	0.0182768	0.0598298	0.00463437	0.476512	Yes	No	1.54775	0.0479827
M451.3566T161	C31H47O2	Unknown	No	0.179385	0.0347569	0.0553721	0.0268385	0.0343949	0.376556	0.629624	No	No	0.543363	-0.557674
M575.5032T156	C37H67O4	Unknown	No	0.163764	0.00126836	0.0486671	0	0.0505505	1.31551e-05	0.955767	Yes	No	6.28956	0.017662
M183.0649T79	C9H11O4	Unknown	No	0.156274	0.000786867	0	0.0482385	0.0138944	0.133886	9.76285e-09	No	Yes	-1.81902	6.30309
M251.1637T124	C15H23O3	arteannuin E/F/K/N (putative)	No	0.154826	0.0311624	0.0200374	0.0477915	0.0255919	0.47142	0.680703	No	No	-0.791047	0.519316
M233.1532T106	C15H21O2	6,7-dehydroartemisinic acid/isoannulide/arteannuin R /deoxyarteannuin B (putative)	No	0.1539	0.0314174	0.0297659	0.0475057	0.0359884	0.41134	0.418249	No	No	-0.263361	0.448535
M447.4194T157	C30H55O2	Unknown	No	0.152892	0.0178191	0.0471946	0.00179386	0.012156	0.513622	0.0230085	No	Yes	1.59746	-2.2205
M251.1638T109	C15H23O3	arteannuin E/F/K/N (putative)	No	0.149085	0.00760531	0.0323809	0.00456829	0.0460193	0.00505001	0.374225	Yes	No	2.6871	0.339278
M153.1271T108	C10H17O	camphor	No	0.145607	0.00622499	0.0427734	0.00367225	0.0449458	0.00169961	0.585943	Yes	No	3.14779	-0.0112406
M163.0752T75	C10H11O2	Unknown	No	0.144867	0	0.0447173	0	0.042265	4.89139e-29	0.539761	Yes	No	999	-0.0813692
M203.1794T127	C15H23	amorpha-4,11-diene hydroperoxide (putative)	No	0.138829	0.0363607	0.016572	0.0428536	0.0178911	2.18476e-06	0.391191	Yes	No	-1.20071	0.1986
M233.1533T94	C15H21O2	6,7-dehydroartemisinic acid/isoannulide/arteannuin R /deoxyarteannuin B (putative)	No	0.137174	0.0102226	0.0423427	0.00720968	0.0249967	0.0385242	0.19381	Yes	No	1.94969	-0.706763
M221.1900T106	C15H25O	dihydroartemisinic aldehyde/artemisinic alcohol (putative)	No	0.137171	0.0200088	0	0.0423417	0.00859804	3.64374e-06	0.000499399	Yes	Yes	-2.85832	1.34816
M611.4667T156	C39H63O5	Unknown	No	0.133259	0.00952538	0.0411341	0.0129603	0.0268271	0.0760394	0.461427	No	No	1.59571	-0.34852
M281.1745T98	C16H25O4	Unknown	No	0.130485	0.0402778	0.000262018	0.0275867	0.00235377	2.20496e-06	0.985336	Yes	No	-4.69734	-0.43724
M181.0705T11	C6H13O6	Unknown	No	0.128104	0	0	0.0362348	0.0395428	0.637486	2.10041e-27	No	Yes	0.126039	999
M233.1533T122	C15H21O2	6,7-dehydroartemisinic acid/isoannulide/arteannuin R /deoxyarteannuin B (putative)	No	0.123194	0.0311756	0.00913361	0.0380273	0.00988864	9.13276e-07	0.258699	Yes	No	-1.86315	0.249396
M225.1487T115	C13H21O3	Unknown	No	0.12162	0.0122759	0.0375414	0.0243124	0.0362777	0.125104	0.276006	No	No	1.01261	0.282434
M227.1275T100	C12H19O4	Unknown	No	0.120904	0	0.0373204	0	0.036734	7.302e-34	0.809785	Yes	No	999	-0.0228481
M235.1692T98	C15H23O2	arteannuin I/J (putative)	No	0.120147	0.0305054	0.0370868	0.0242641	0.0360296	0.0454998	0.235408	Yes	No	0.416823	-0.16485
M253.1432T97	C14H21O4	Unknown	No	0.11981	0.0231261	0.0369828	0.0183949	0.0339583	0.0156761	0.759244	Yes	No	0.772781	-0.1993
M441.3723T155	C30H49O2	Unknown	No	0.117225	0.0248892	0.0104318	0.0361848	0.00199222	0.000902049	0.0658754	Yes	No	-2.29743	0.112179
M557.5290T163	C38H69O2	Unknown	No	0.109233	0.00127616	0.020908	0.00657431	0.033718	0.159872	0.0457292	No	Yes	2.79873	0.860976
M203.1792T137	C15H23	amorpha-4,11-diene hydroperoxide (putative)	No	0.102239	0.026728	0.0164642	0.0315588	0.0179058	0.00512373	0.321096	Yes	No	-0.76202	0.195627
M265.1436T84	C15H21O4	deoxyartemisitene (putative)	No	0.0961615	0.029683	0.0155277	0.0285641	0	3.47764e-22	1.9069e-21	Yes	Yes	-1.90734	-0.662458
M439.3566T156	C30H47O2	Unknown	No	0.095182	0.0164762	0.0293806	0.0178157	0.0240253	0.0165133	0.976924	Yes	No	0.639131	-0.132217
M235.1326T91	C14H19O3	Unknown	No	0.0949602	0.0067035	0.0293122	0.0152096	0.0211286	0.000135358	0.229998	Yes	No	1.2028	0.0128618
M259.2055T143	C18H27O	Unknown	No	0.0937197	0.0115838	0.0289292	0.0108636	0.0240245	0.110103	0.453247	No	No	1.23819	-0.215651
M645.4577T145	C35H65O10	Unknown	No	0.0931909	0	0.0238864	0	0.028766	3.68382e-24	0.25114	Yes	No	999	0.268177
M153.0754T12	C5H13O5	Unknown	No	0.0906483	0	0	0.00787592	0.0279812	0.0727861	4.15112e-06	No	Yes	1.82894	999
M193.1586T127	C13H21O	Unknown	No	0.0904581	0.0156782	0.0271963	0.0168679	0.0279224	0.000150575	0.727246	Yes	No	0.760059	0.0630684
M155.1428T119	C10H19O	Unknown	No	0.0888949	0.0274399	0	0.0222807	0	3.83411e-28	0.0878969	Yes	No	-999	-0.300484
M569.4362T154	C40H57O2	Unknown	No	0.0844758	0.0120219	0.0260758	0	0	0.236491	8.82182e-08	No	Yes	1.11705	-999
M221.1536T94	C14H21O2	arteannuin X	No	0.0823615	0.0254232	0	0.0174289	0	6.36956e-13	0.331761	Yes	No	-999	-0.544669
M209.1536T90	C13H21O2	Unknown	No	0.0817458	0.0078275	0.0139503	0.0216234	0.0252332	0.0407261	0.000167751	Yes	Yes	0.411935	1.10539
M235.1329T94	C14H19O3	Unknown	No	0.0815818	0.0124676	0.0109452	0.0251825	0.00898253	0.116357	0.364611	No	No	-0.917872	0.545223
M591.4982T163	C37H67O5	Unknown	No	0.0815355	0	0.0251682	0	0.0168263	1.58853e-20	0.373906	Yes	No	999	-0.580883
M557.5297T160	C38H69O2	Unknown	No	0.0705088	0.00672418	0.0217645	0.00289262	0.0198642	0.0637548	0.780199	No	No	2.11395	-0.324094
M233.1536T125	C15H21O2	6,7-dehydroartemisinic acid/isoannulide/arteannuin R /deoxyarteannuin B (putative)	No	0.0699543	0.0215934	0.0117226	0.0151663	0.017869	0.186999	0.952318	No	No	-0.312932	-0.012207
M189.1272T69	C13H17O	Unknown	No	0.0684212	0	0	0.00417996	0.0211202	0.0797754	4.40224e-08	No	Yes	2.33706	999
M553.4332T154	C29H61O9	Unknown	No	0.0674006	0.00351542	0.0208051	0	0	0.0158098	2.14386e-05	Yes	Yes	2.56517	-999
M351.2530T125	C21H35O4	Unknown	No	0.0608712	0	0.0182223	0.000859355	0.0187896	1.50664e-05	0.968141	Yes	No	5.42859	0.108752
M267.1591T87	C15H23O4	Unknown	No	0.0604901	0.00989323	0.018672	0.00518566	0.0135993	0.00333936	0.0195153	Yes	Yes	1.09772	-0.604684
M353.2684T141	C21H37O4	Unknown	No	0.059798	0.000928897	0.0184584	0.00183319	0.0146217	0.00164396	0.923719	Yes	No	3.58213	-0.236594
M543.3892T143	C30H55O8	Unknown	No	0.0593813	0	0.0183297	0	0.00893796	3.12247e-19	0.093012	Yes	No	999	-1.03617
M463.3779T161	C29H51O4	Unknown	No	0.0570109	0.0079214	0.017598	0.0116331	0.0136977	0.193174	0.462105	No	No	0.678468	-0.0107035
M165.0540T64	C9H9O3	courmaric acid (putative)	No	0.0562187	0	0	0.0173535	0	2.91685e-24	2.91685e-24	Yes	Yes	-999	999
M331.1753T140	C16H27O7	Unknown	No	0.0525299	0.0162148	0	0.0149648	0	4.22841e-26	0.704338	Yes	No	-999	-0.115742
M387.2888T143	C25H39O3	Unknown	No	0.049953	0.0103986	0.0154194	0.0113034	0.0117955	0.635853	0.598779	No	No	0.326565	-0.160551
M445.3682T160	C29H49O3	Unknown	No	0.0486924	0.00736829	0.0150303	0.00302411	0.00491469	0.360835	0.00979611	No	Yes	0.940497	-1.49641
M189.1271T64	C13H17O	Unknown	No	0.0484635	0	0.0014471	0.010522	0.0149596	0.305037	7.6293e-08	No	Yes	0.640877	4.13822
M395.3171T148	C24H43O4	Unknown	No	0.0432585	0	0.00780641	0	0.013353	6.57391e-07	0.43012	Yes	No	999	0.774429
M255.1951T96	C15H27O3	Unknown	No	0.0420704	0.0108002	0.0044639	0.0129862	0.00300083	0.0480557	0.977357	Yes	No	-1.67198	0.0667605
M587.4152T143	C32H59O9	Unknown	No	0.0418396	0	0.012915	0	0.00487831	6.79948e-08	0.128241	Yes	No	999	-1.40459
M279.2319T133	C18H31O2	Unknown	No	0.0399599	0.000944209	0.00909767	0	0.0123348	0.00473131	0.392593	Yes	No	4.50455	0.296701
M355.1020T50	C16H19O9	scopolin/chlorogenic acid (putative)	No	0.0399019	0	0	0.0123168	0.0105778	0.563414	0.000445014	No	Yes	-0.219592	999
M497.3830T150	C29H53O6	Unknown	No	0.0398622	0	0.0123046	0	7.49709e-05	3.11627e-07	9.30692e-06	Yes	Yes	999	-7.35865
M309.2790T149	C20H37O2	Unknown	No	0.0372825	0.00152771	0.0115083	0.00808314	0.00760292	0.545854	0.531669	No	No	0.991683	0.266982
M387.1282T79	C17H23O10	Unknown	No	0.0367804	0	0	0.0113533	0	8.01677e-23	8.01677e-23	Yes	Yes	-999	999
M597.4888T177	C39H65O4	Unknown	No	0.0354682	0.000764779	0.0109483	0.00127059	0.00323572	0.00392953	0.217762	Yes	No	2.8009	-1.3781
M301.2008T103	C16H29O5	Unknown	No	0.0338369	0.0104447	0.00991996	0.0102146	0.0048657	0.472816	0.158314	No	No	-0.482593	-0.433405
M165.1276T110	C11H17O	Unknown	No	0.0305646	0	0	0.00943463	0	0.00104265	0.00104265	Yes	Yes	-999	999
M241.1431T100	C13H21O4	Unknown	No	0.0265189	0	0.0081858	0	0.00611203	4.3632e-16	0.302841	Yes	No	999	-0.421473
M205.1947T139	C15H25	amorpha-4,11-diene (putative)	No	0.0257834	0.00625443	0.0031702	0.00795878	0.00265204	0.0217265	0.638214	Yes	No	-1.28758	0.171029
M499.3639T143	C28H51O7	Unknown	No	0.0254398	0	0.0078527	0	0.00657012	1.86674e-20	0.734683	Yes	No	999	-0.25727
M271.1538T82	C14H23O5	Unknown	No	0.025036	0.00317747	0.0012982	0.00772807	0	0.0016486	0.232187	Yes	No	-3.07048	0.788003
M353.2688T129	C21H37O4	Unknown	No	0.0230068	0	0.00553199	0	0.00710171	8.45249e-06	0.141273	Yes	No	999	0.360368
M273.0752T89	C15H13O5	naringenin chalcone (putative)	No	0.0227626	0	0	0	0.00702633	0.00119628	0.00119628	Yes	Yes	999	999
M265.1794T109	C16H25O3	Unknown	No	0.0224905	0.00617508	0.00589447	0.00694233	0.00633035	0.408128	0.400922	No	No	-0.10167	0.137088
M439.3560T150	C30H47O2	Unknown	No	0.0185626	0.00299121	0	0.00572988	0	1.13632e-07	0.25094	Yes	No	-999	0.937777
M585.4347T150	C33H61O8	Unknown	No	0.0178929	0	0.00461628	0	0.00552316	8.82861e-07	0.548429	Yes	No	999	0.258761
M221.1536T139	C14H21O2	Unknown	No	0.0138206	0.0039946	0.00426612	0.0035089	0.0034119	0.521778	0.574858	No	No	0.033171	-0.255326
M258.1238T81	C16H18O3	Unknown	No	0.0133275	0	0	0.00411392	0	0.00106836	0.00106836	Yes	Yes	-999	999
M221.1897T136	C15H25O	dihydroartemisinic aldehyde/artemisinic alcohol (putative)	No	0.00931092	0.00142028	0.00135244	0.00287408	0.00152566	0.0822896	0.363976	No	No	-0.577327	0.666111
